# Supplementary material
Source: MDPI journal article supplement (https://www.mdpi.com/search?q=ijms-20-03734)
Supplement: s001 [file ijms-20-03734-s001.pdf]

Table S1. Sequences and relevant information used for phylogenetic analysis of the chitin synthase gene.

| <b>Genes</b>    | <b>GenBank No</b> | <b>Species</b>                       |
|-----------------|-------------------|--------------------------------------|
| <i>DcCHS</i>    |                   | <i>Diaphorina citri</i>              |
| <i>ApCHS</i>    | XP_003247517.1    | <i>Acyrtosiphon pisum</i>            |
| <i>AgCHS1</i>   | AFJ00066          | <i>Aphis Glycines</i>                |
| <i>LsCHS1a</i>  | AFC61179          | <i>Laodelphax striatellus</i>        |
| <i>LsCHS1b</i>  | AFC61178          | <i>Laodelphax striatellus</i>        |
| <i>NICHS1a</i>  | AFC61181          | <i>Nilaparvata lugens</i>            |
| <i>NICHS1b</i>  | AFC61180          | <i>Nilaparvata lugens</i>            |
| <i>BmCHS</i>    | AFB83705          | <i>Bombyx mori</i>                   |
| <i>CfCHS</i>    | ACD84882          | <i>Choristoneura fumiferana</i>      |
| <i>CmCHS1</i>   | AJG44538          | <i>Cnaphalocrocis medinalis</i>      |
| <i>CmCHS2</i>   | AJG44539          | <i>Cnaphalocrocis medinalis</i>      |
| <i>TCiCHS</i>   | KR611528          | <i>Toxoptera citricida</i>           |
| <i>AaCHS1</i>   | XP_001662200.1    | <i>Aedes aegypti</i>                 |
| <i>CqCHS1</i>   | XP_001866798      | <i>Culex quinquefasciatus</i>        |
| <i>DmCHS1</i>   | NP_524233         | <i>Drosophila melanogaster</i>       |
| <i>EoCHS1a</i>  | ACA50089          | <i>Ectropis obliqua</i>              |
| <i>EoCHS1b</i>  | ACD10553          | <i>Ectropis obliqua</i>              |
| <i>HaCHS1</i>   | AKZ08594          | <i>Helicoverpa armigera</i>          |
| <i>HaCHS2</i>   | AKZ08595          | <i>Helicoverpa armigera</i>          |
| <i>MbCHS1</i>   | ABX56676          | <i>Mamestra brassicae</i>            |
| <i>McCHS1</i>   | AJF93428          | <i>Mamestra configurata</i>          |
| <i>AmCHS1</i>   | XP_395677.4       | <i>Apis mellifera</i>                |
| <i>AmCHS2</i>   | XP_001121152.2    | <i>Apis mellifera</i>                |
| <i>PoCHS1</i>   | AOE23678          | <i>Phthorimaea operculella</i>       |
| <i>PoCHS2</i>   | AIJ50381          | <i>Phthorimaea operculella</i>       |
| <i>AgaCHS1a</i> | XP_321336.5       | <i>Anopheles gambiae</i>             |
| <i>AgaCHS1b</i> | XP_321336.4       | <i>Anopheles gambiae</i>             |
| <i>AgaCHS2</i>  | XP_321951         | <i>Anopheles gambiae</i>             |
| <i>AqCHS1</i>   | ABD74441          | <i>Anopheles quadrimaculatus</i>     |
| <i>LcCHS1</i>   | AAG09712          | <i>Lucilia cuprina</i>               |
| <i>LmCHS1a</i>  | ACY38588          | <i>Locusta migratoria manilensis</i> |
| <i>LmCHS1b</i>  | ACY38589          | <i>Locusta migratoria manilensis</i> |
| <i>MsCHS1</i>   | AAL38051          | <i>Manduca sexta</i>                 |
| <i>PxCHS1</i>   | BAF47974.1        | <i>Plutella xylostella</i>           |
| <i>SeCHS1</i>   | AAZ03545          | <i>Spodoptera exigua</i>             |
| <i>SeCHS2</i>   | ABI96087          | <i>Spodoptera exigua</i>             |
| <i>TcCHS1a</i>  | AAQ55059          | <i>Tribolium castaneum</i>           |
| <i>TcCHS1b</i>  | AAQ55060          | <i>Tribolium castaneum</i>           |
| <i>AaCHS2</i>   | XP_001651163      | <i>Aedes aegypti</i>                 |
| <i>CqCHS2</i>   | XP_001864594      | <i>Culex quinquefasciatus</i>        |
| <i>DmCHS2</i>   | NP_524209         | <i>Drosophila melanogaster</i>       |

---

|                |          |                              |
|----------------|----------|------------------------------|
| <i>MsCHS2</i>  | AAX20091 | <i>Manduca sexta</i>         |
| <i>OfCHS1</i>  | ACB13821 | <i>Ostrinia furnacalis</i>   |
| <i>OfCHS2</i>  | ABB97082 | <i>Ostrinia furnacalis</i>   |
| <i>SfrCHS2</i> | AAS12599 | <i>Spodoptera frugiperda</i> |
| <i>TcCHS2</i>  | AAQ55061 | <i>Tribolium castaneum</i>   |
| <i>AtCHS</i>   | AFM38193 | <i>Anasa tristis</i>         |
| <i>BdCHS1a</i> | AEN03040 | <i>Bactrocera dorsalis</i>   |
| <i>BdCHS1b</i> | AGB51153 | <i>Bactrocera dorsalis</i>   |
| <i>BdCHS2</i>  | AGC38392 | <i>Bactrocera dorsalis</i>   |

---
